# Supplementary figures and images for: The Smc5/6 complex counteracts R-loop formation at highly transcribed genes in cooperation with RNase H2
Source: eLife journal article supplement (doi:10.7554/elife.96626), 2024-10-15

**A**

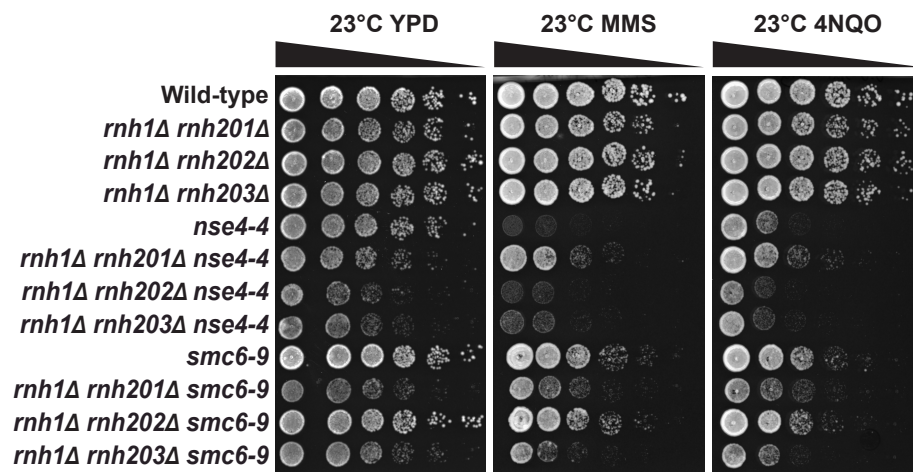

**B**

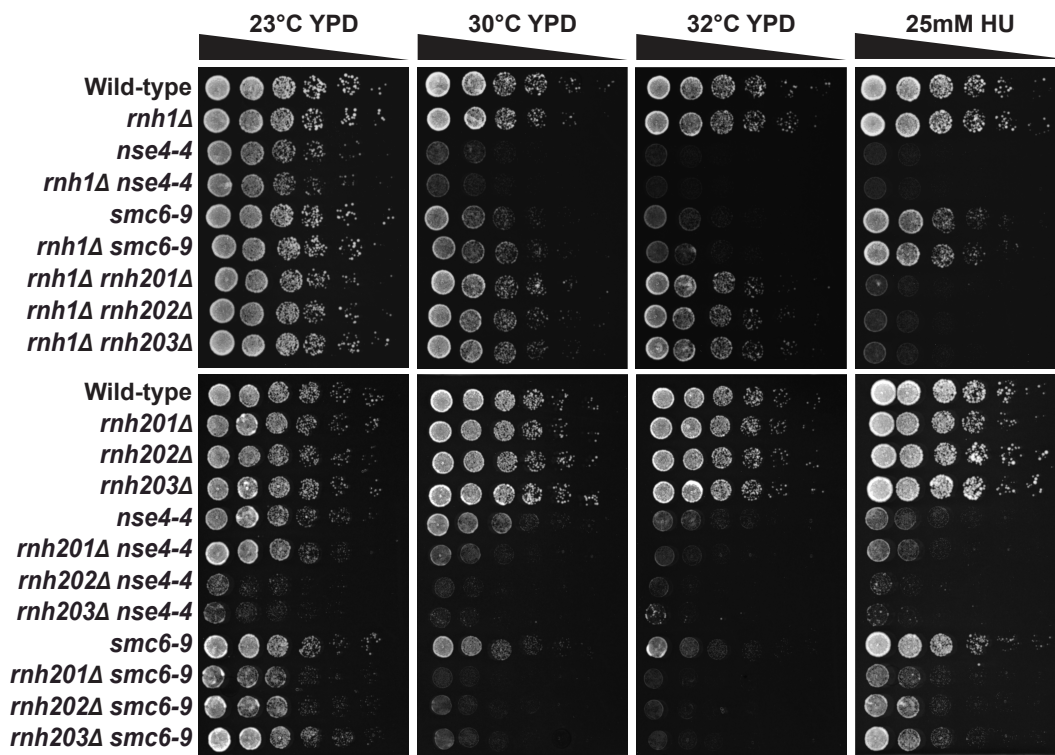

**C**

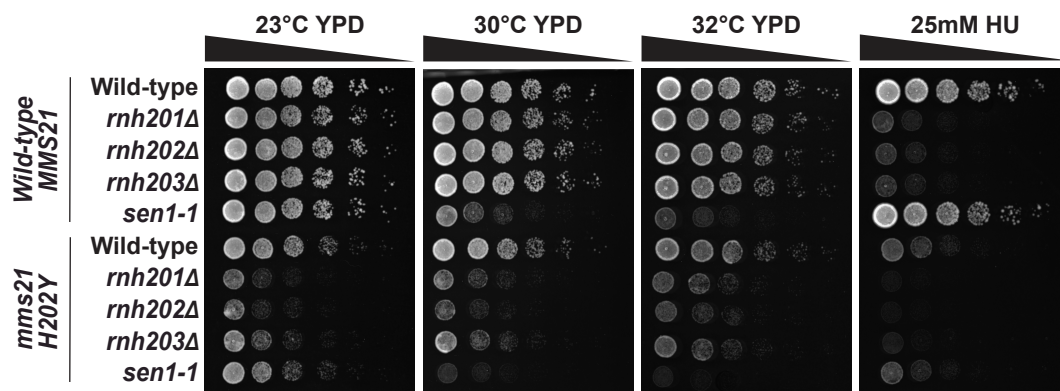

Supplement: supp [file elife_poa_e96626_Figure_1_figure_supplement_1.pdf › elife_poa_e96626_Figure_1_figure_supplement_1.pdf]

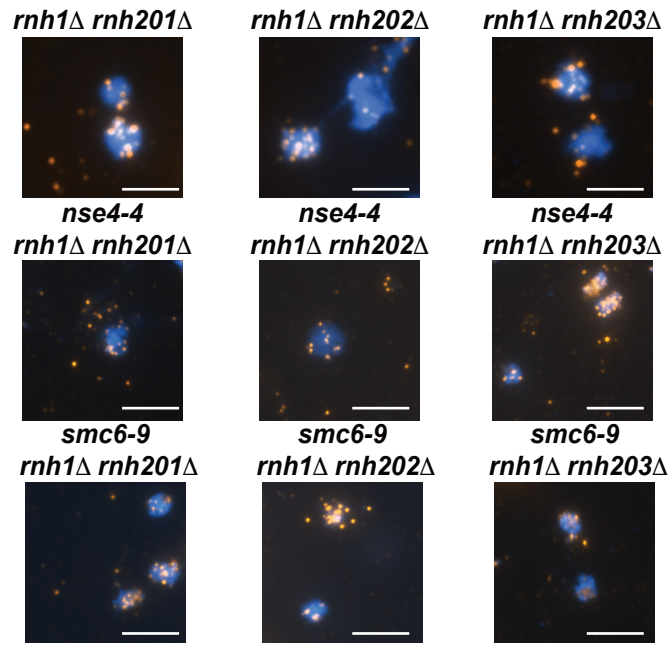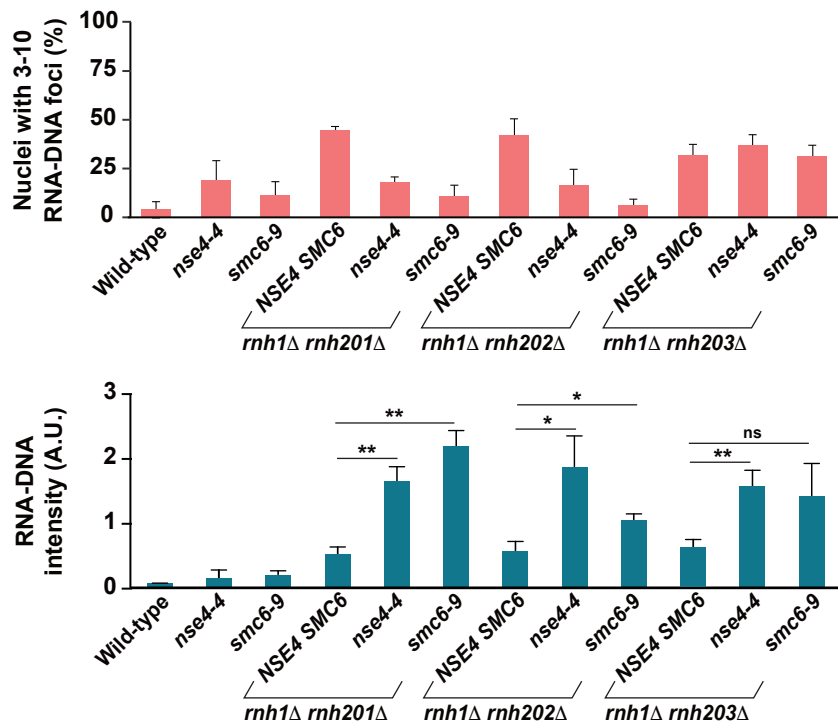

Supplement: supp [file elife_poa_e96626_Figure_2_figure_supplement_1.pdf › elife_poa_e96626_Figure_2_figure_supplement_1.pdf]

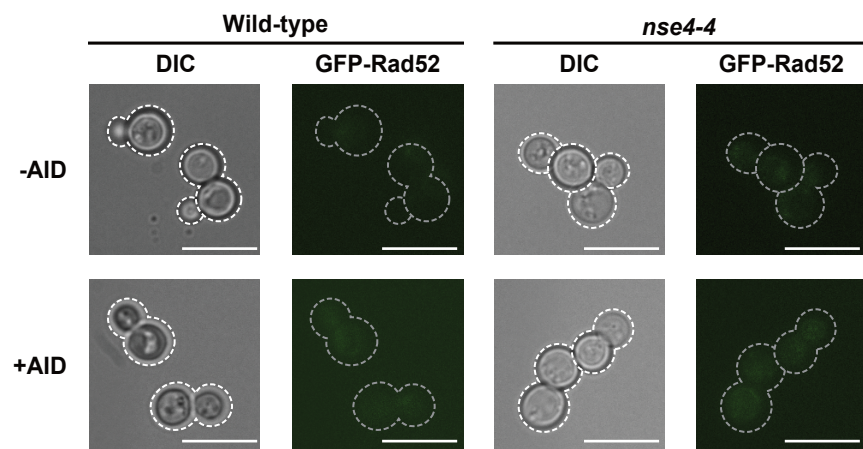

Supplement: supp [file elife_poa_e96626_Figure_3_figure_supplement_1.pdf › elife_poa_e96626_Figure_3_figure_supplement_1.pdf]

**A**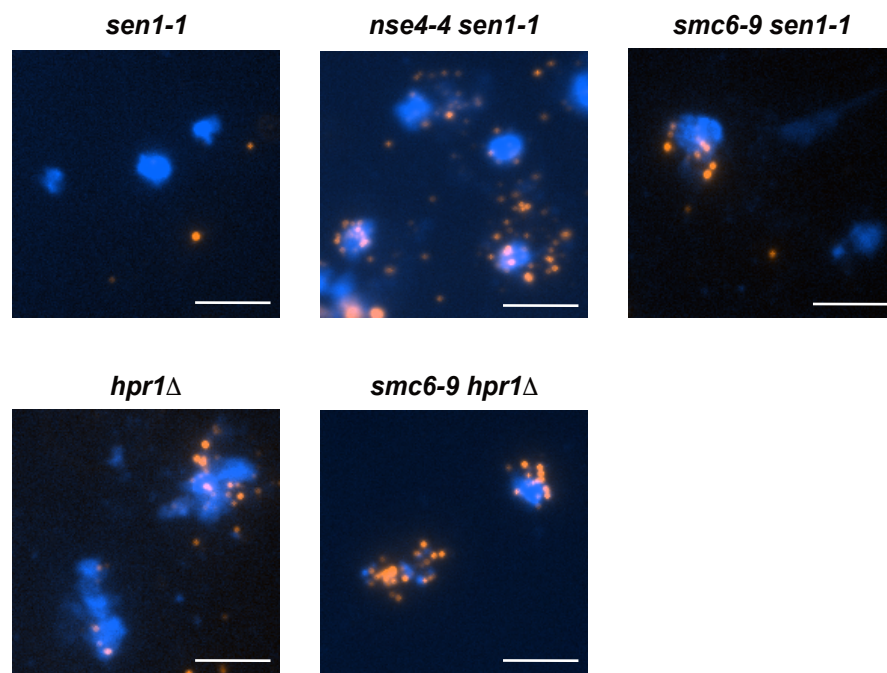**B**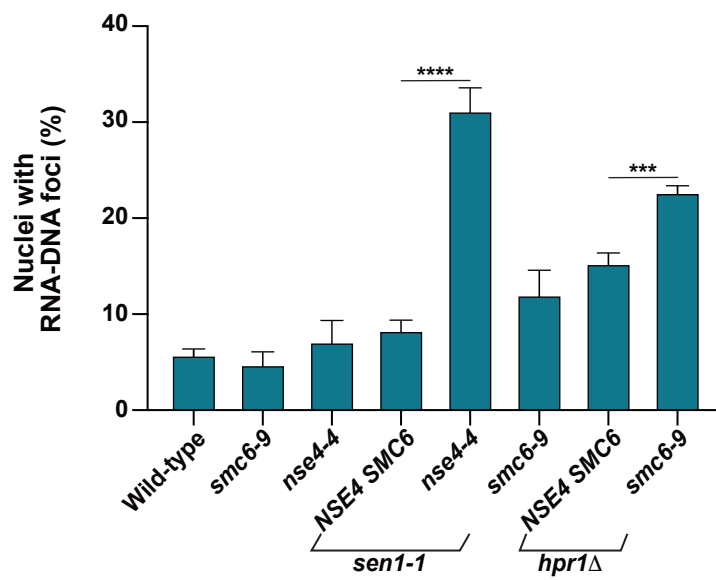

Supplement: supp [file elife_poa_e96626_Figure_4_figure_supplement_1.pdf › elife_poa_e96626_Figure_4_figure_supplement_1.pdf]

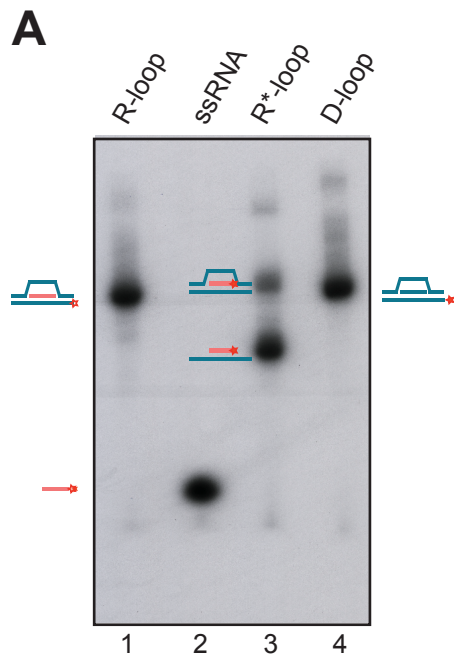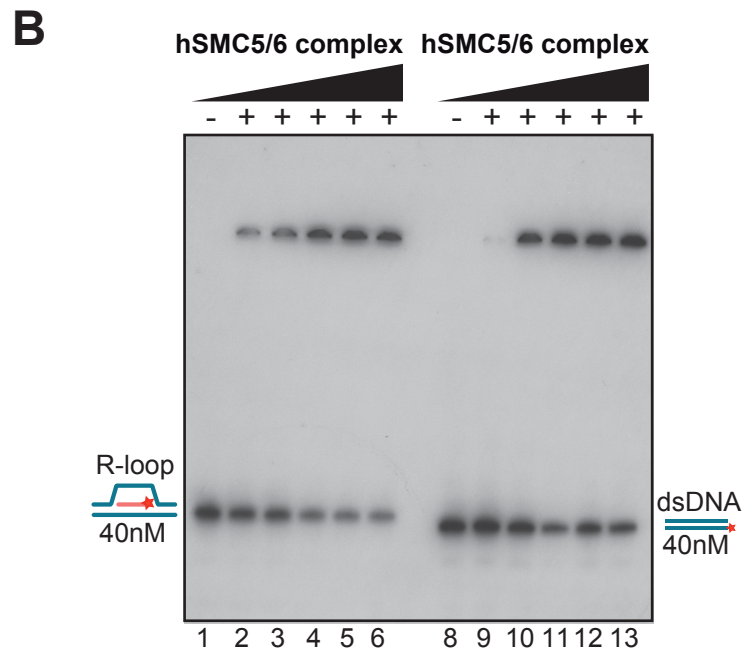

**C**

| R-loop                  |                     | D-loop                  |                     |
|-------------------------|---------------------|-------------------------|---------------------|
| $K_D$ values [R square] | Hill's Co-efficient | $K_D$ values [R square] | Hill's Co-efficient |
| 4.058 nM [0.8647]       | 3.695               | 4.288 nM [0.8427]       | 6.775               |

Supplement: supp [file elife_poa_e96626_Figure_5_figure_supplement_1.pdf › elife_poa_e96626_Figure_5_figure_supplement_1.pdf]

**A**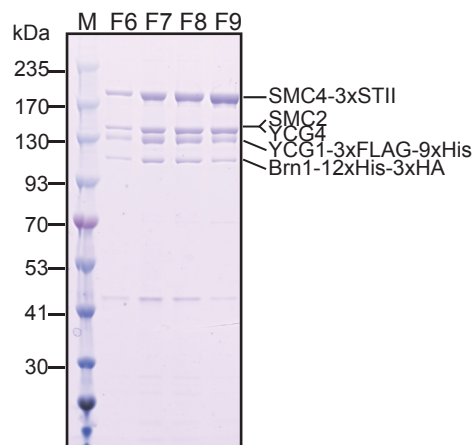**B**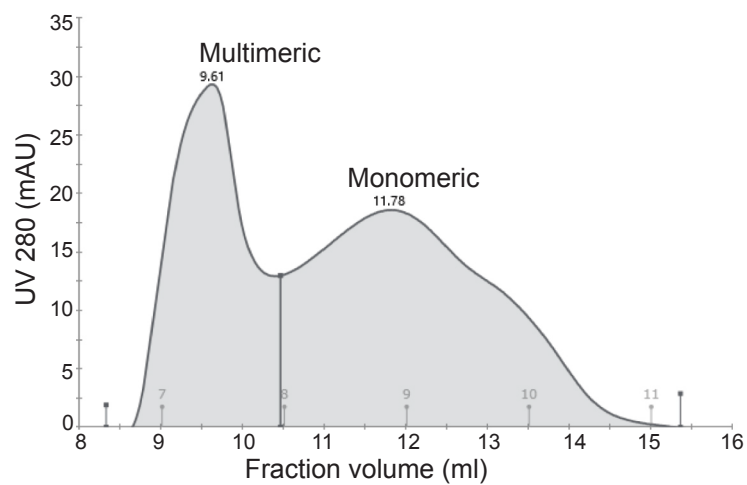**C**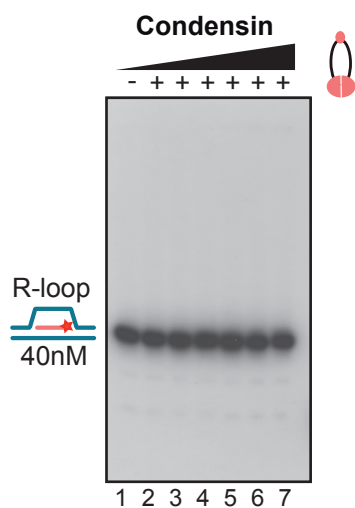**D**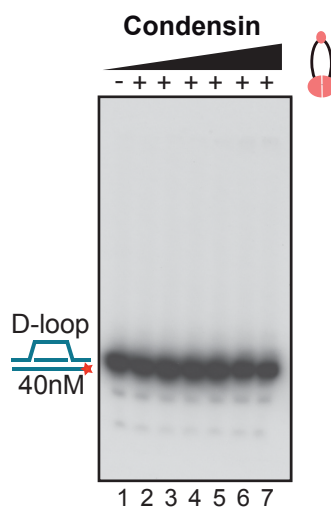**E**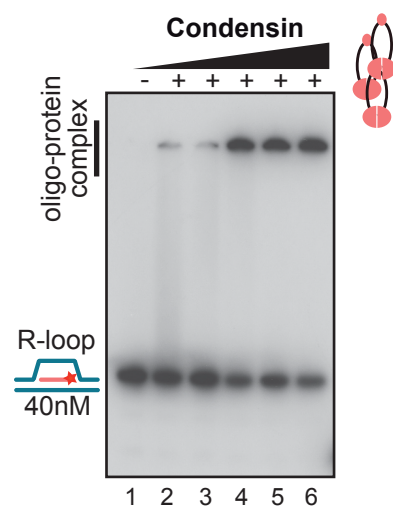**F**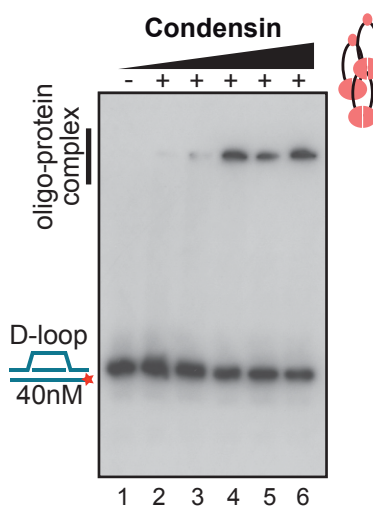

Supplement: supp [file elife_poa_e96626_Figure_5_figure_supplement_2.pdf › elife_poa_e96626_Figure_5_figure_supplement_2.pdf]

**A**

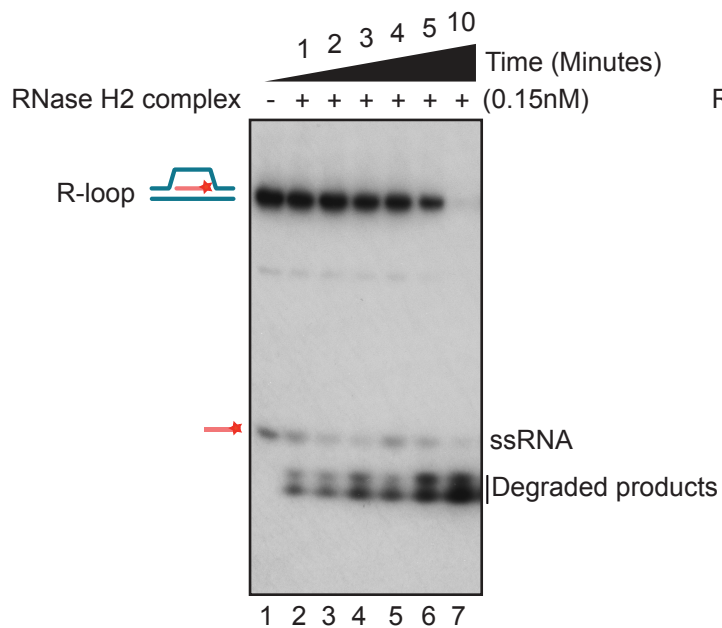

**B**

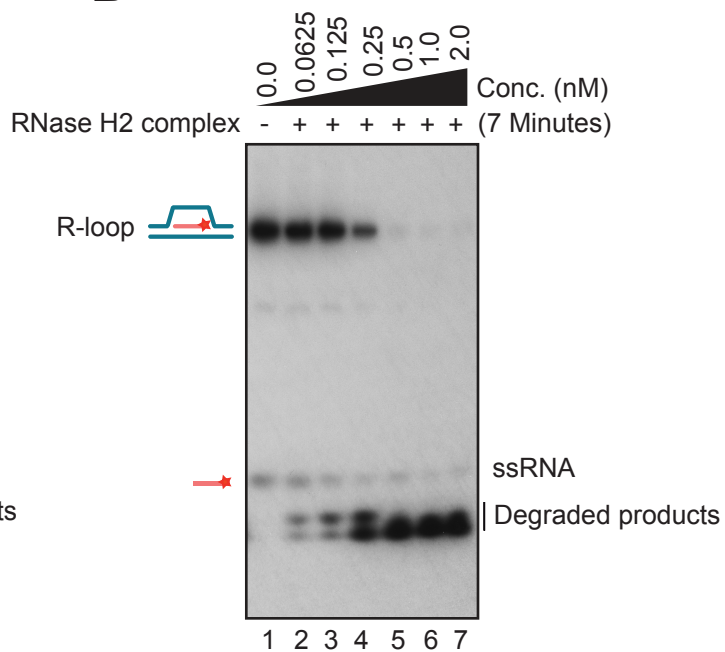

**C**

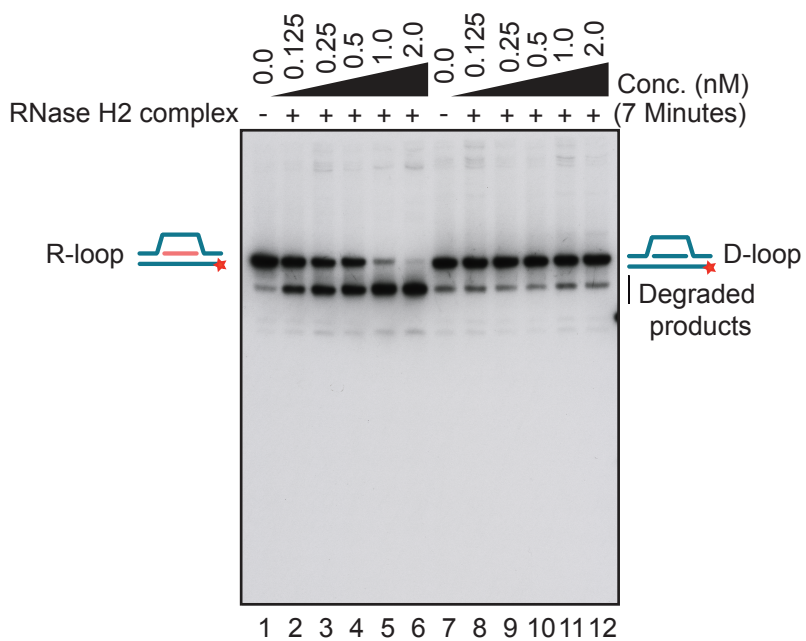

Supplement: supp [file elife_poa_e96626_Figure_6_figure_supplement_1.pdf › elife_poa_e96626_Figure_6_figure_supplement_1.pdf]

**A**

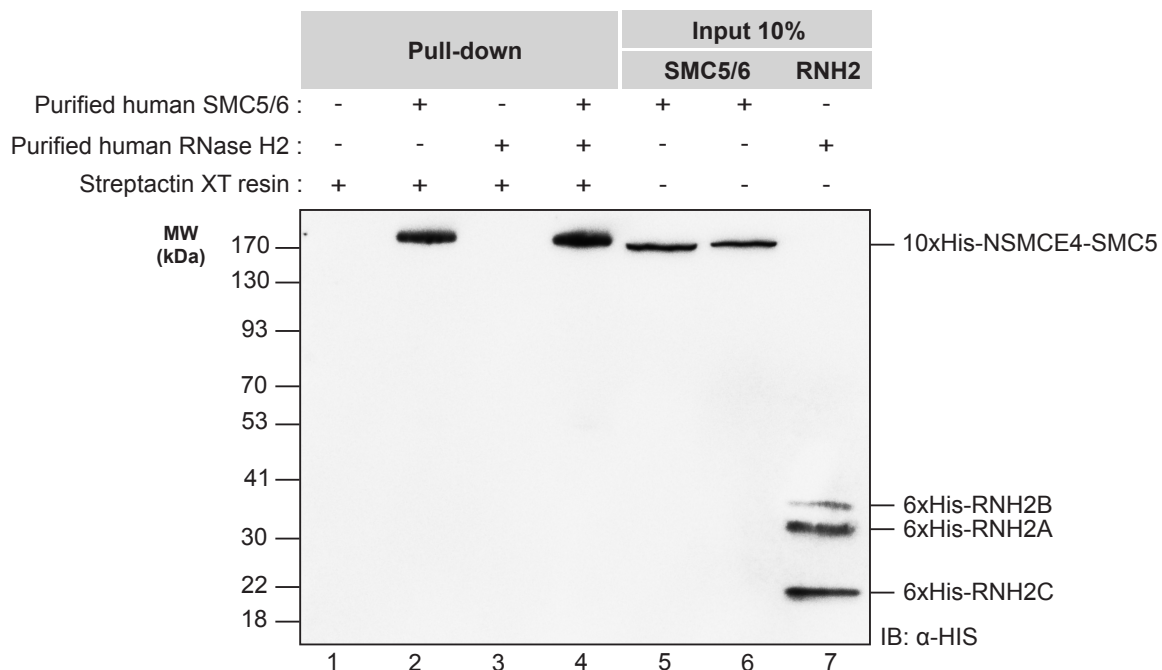

**B**

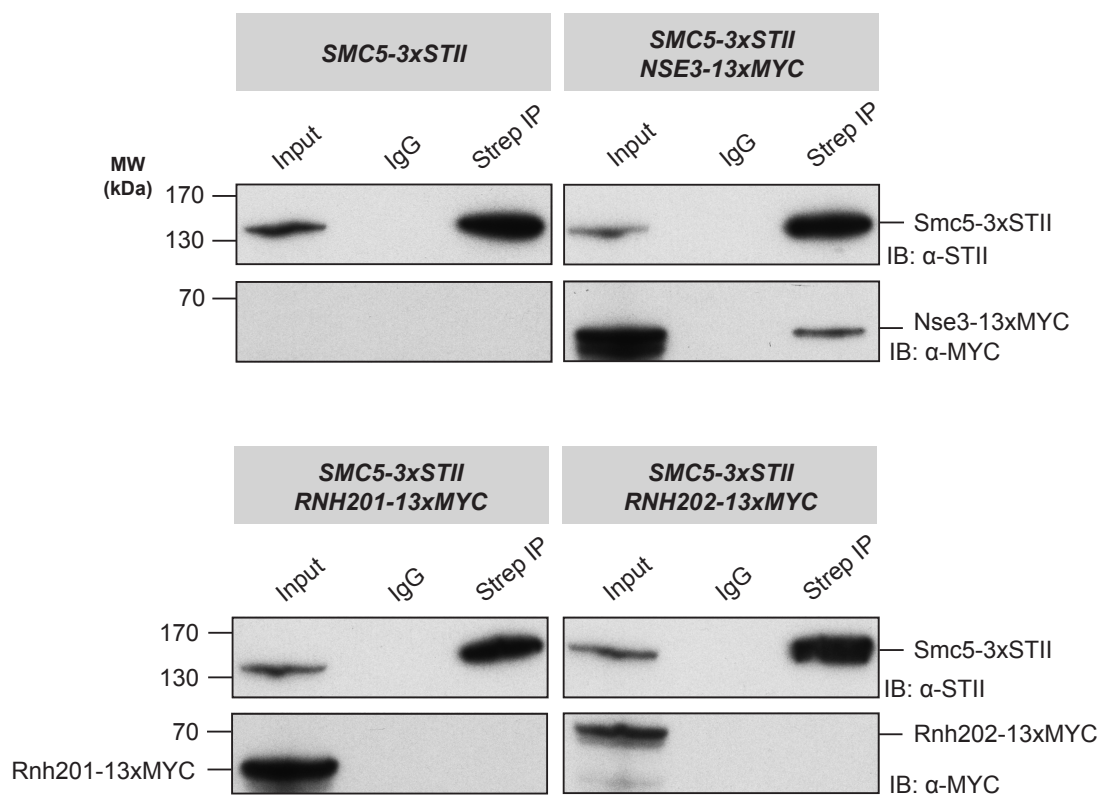

Supplement: supp [file elife_poa_e96626_Figure_6_figure_supplement_2.pdf › elife_poa_e96626_Figure_6_figure_supplement_2.pdf]
